# Supplementary material for: Plasmonic Z-scheme α/β-Bi2O3–Ag–AgCl photocatalyst with enhanced visible-light photocatalytic performance
Source: Royal Society of Chemistry journal article supplement (doi:10.1039/c4ra07938h), 2014-01-01
Supplement: c4ra07938h1.pdf [file c4ra07938h1.pdf]

# Supporting Information

## Plasmonic Z-Scheme $\alpha/\beta$ -Bi<sub>2</sub>O<sub>3</sub>-Ag-AgCl Photocatalyst with Enhanced Visible-Light Photocatalytic Performance

Huijie Cheng,<sup>a</sup> Jungang Hou,<sup>ab\*</sup> Hongmin Zhu,<sup>ab</sup> Xing-Min Guo<sup>a\*</sup>

<sup>a</sup>School of Metallurgical and Ecological Engineering, University of Science and Technology

Beijing, Beijing 100083, China

<sup>b</sup>Tohoku University, 6-6-02 Aramaki-Aza-Aoba, Aoba-ku, Sendai, 980-8579 Japan

E-mail: [jhou@ustb.edu.cn](mailto:jhou@ustb.edu.cn) (J. Hou); [guoxm@ustb.edu.cn](mailto:guoxm@ustb.edu.cn) (X. Guo)

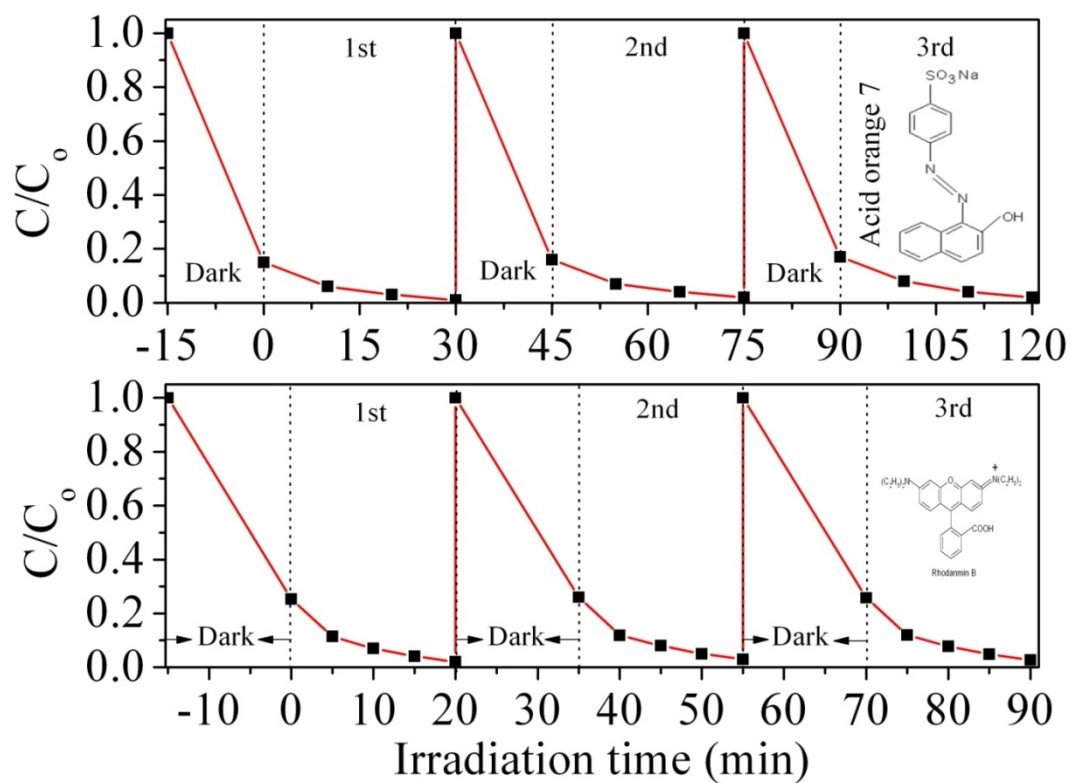

Fig. 1S. Photocatalytic RhB and AO7 degradation curve of the as-prepared hierarchical  $\alpha/\beta$ - $\text{Bi}_2\text{O}_3$ -Ag-10wt%AgCl-30 photocatalysts under visible-light irradiation for three consecutive cycles.

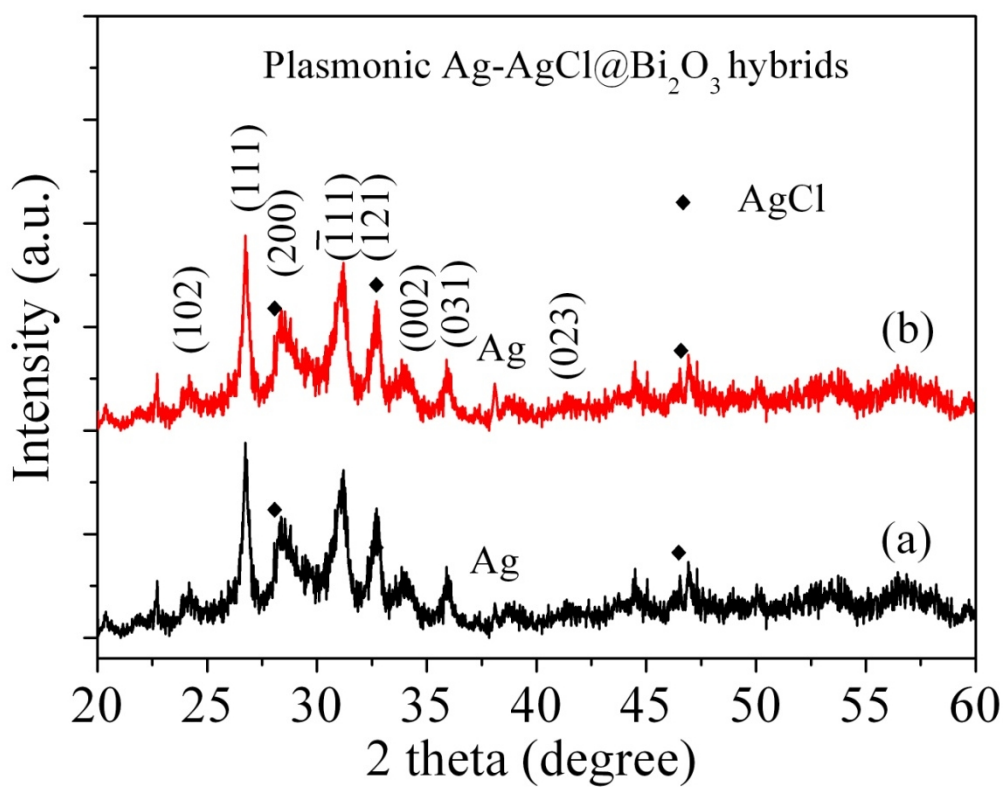

Fig. 2S. XRD patterns of the (a) fresh and (b) the reused  $\alpha/\beta$ -Bi<sub>2</sub>O<sub>3</sub>-Ag-10wt%AgCl-30 photocatalysts after three cycles.
